# Supplementary material for: Greenly synthesized graphene with l-glutathione-modified electrode and its application towards determination of rutin
Source: Royal Society of Chemistry journal article supplement (doi:10.1039/c6ra13457b), 2016-01-01
Supplement: c6ra13457b1.pdf [file c6ra13457b1.pdf]

## Supporting information

### Greenly synthesized graphene with L-glutathione modified electrode and its application towards determination of rutin

Yudong Gao<sup>a</sup>, Lu Wang<sup>a,b</sup>, Yulong Zhang<sup>a</sup>, Shuo Li<sup>a</sup>, Lina Zou<sup>a,\*</sup>, Baoxian Ye<sup>a,\*</sup>

<sup>a</sup> College of Chemistry and Molecular Engineering, Zhengzhou University, Zhengzhou 450001, P R China.

<sup>b</sup> Department of Environmental Engineering and Chemistry, Luoyang Institute of Science and Technology, Luoyang 471023, PR China.

\*Corresponding author. Tel.: +86 0371 67781757; Fax: +86 0371 67763654.

E-mal: yebx@zzu.edu.cn (B. Ye).

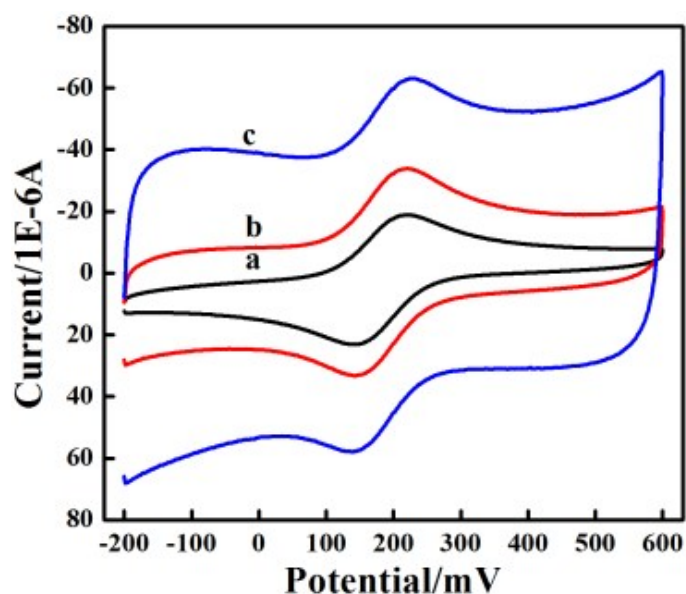

Fig. S1 Cyclic voltammograms of [Fe(CN)<sub>6</sub>]<sup>3-/4-</sup> ( $1.0 \times 10^{-3}$  mol L<sup>-1</sup> containing 0.1 mol L<sup>-1</sup> KCl) at the bare GCE (a), GR/GCE (b) and GSH-GR/GCE (c). Scan rate: 100 mV s<sup>-1</sup>.

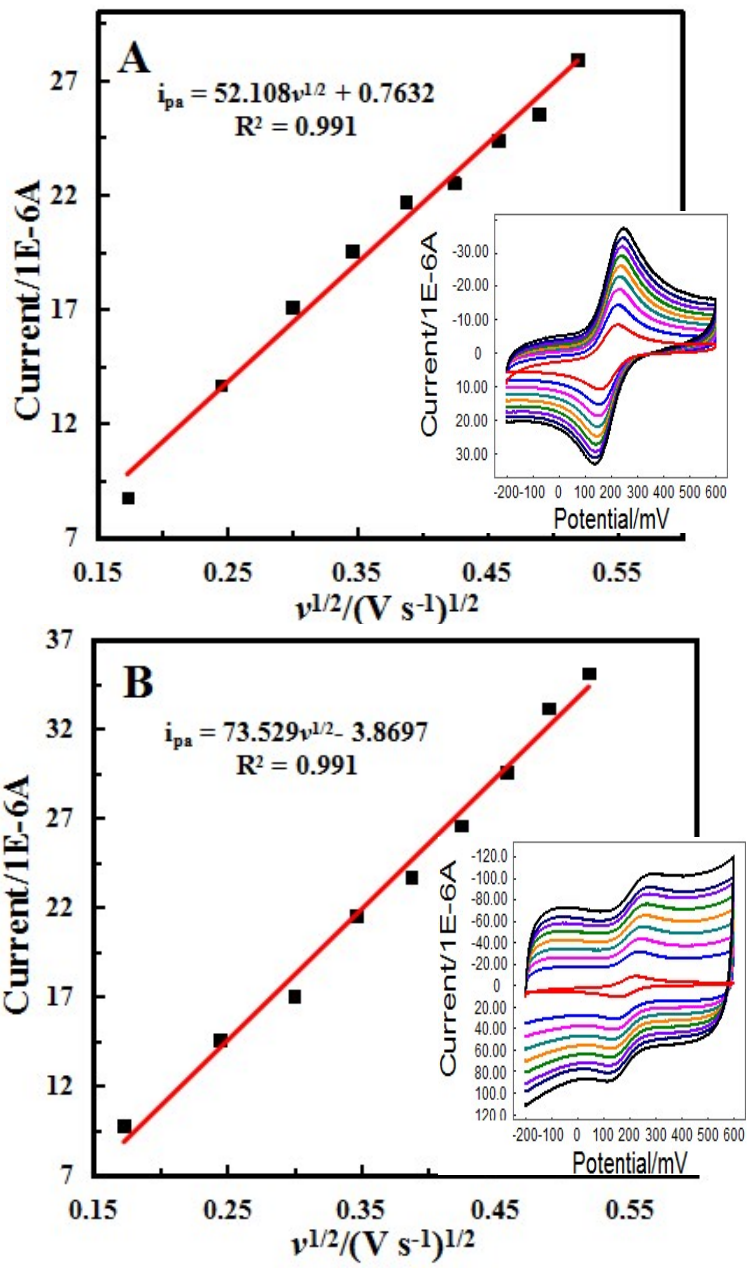

Fig. S2 The linear relations anodic peak current of  $K_3Fe(CN)_6$  against the square root of scan rate at the bare GCE (A) and GSH-GR/GCE (B). Insets are CVs of the bare GCE (in A) and GSH-GR/GCE (in B) in 1.0 mM  $K_3Fe(CN)_6$  at different scan rates from 0.03 to 0.27  $V s^{-1}$ .

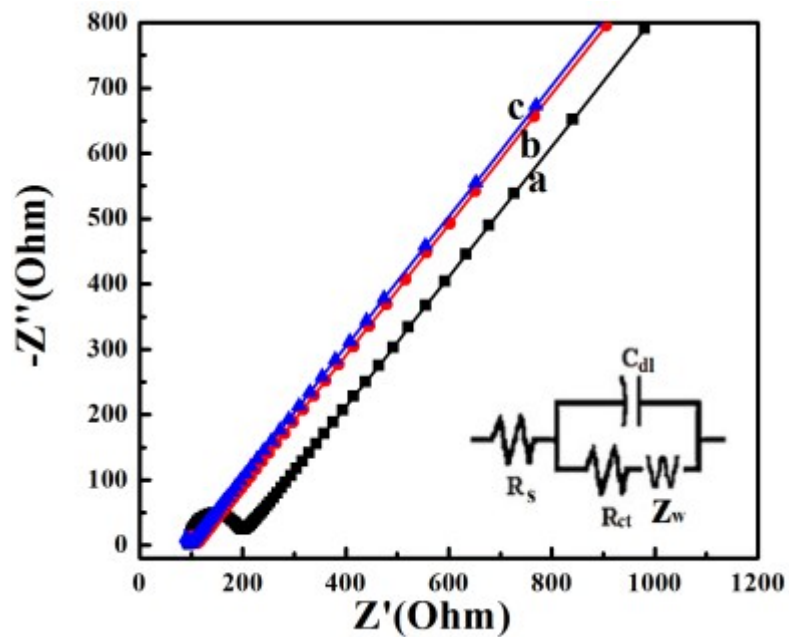

Fig.S3 The EIS of bare GCE(a), GR/GCE(b) and GSH-GR/GCE(c) in  $5.0 \times 10^{-3} \text{ mol L}^{-1} \text{ Fe(CN)}_6^{4-/3-}$  (1:1) solution containing  $0.10 \text{ mol L}^{-1} \text{ KCl}$ ; Frequency range: 1.0MHz-0.01 Hz. The inset is equivalent circuit.
